# Supplementary material
Source: Research Square preprint supplement (doi:10.21203/rs.3.rs-9303109/v1)

**Appendix**
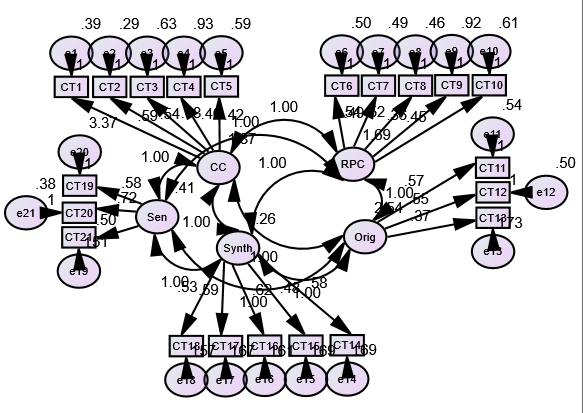

Supplement: Supplementary file 1 [file 0b86b1e33ee4669d5cdfee9b.docx]
